# Supplementary material
Source: Springer Nature journal article supplement (https://www.springermedizin.de/resource/supplementary/12990_2011_411_MOESM4_ESM.pdf/9613220)

**Control****TC-2559 2  $\mu$ M**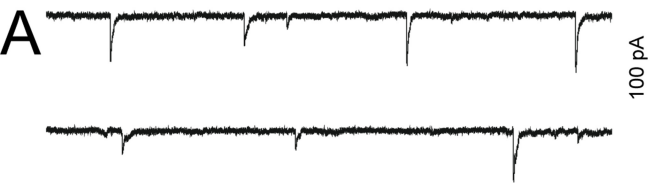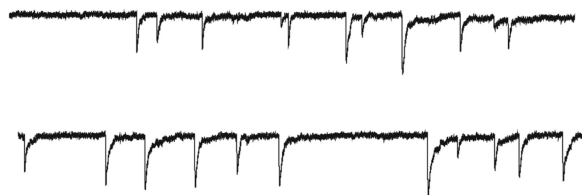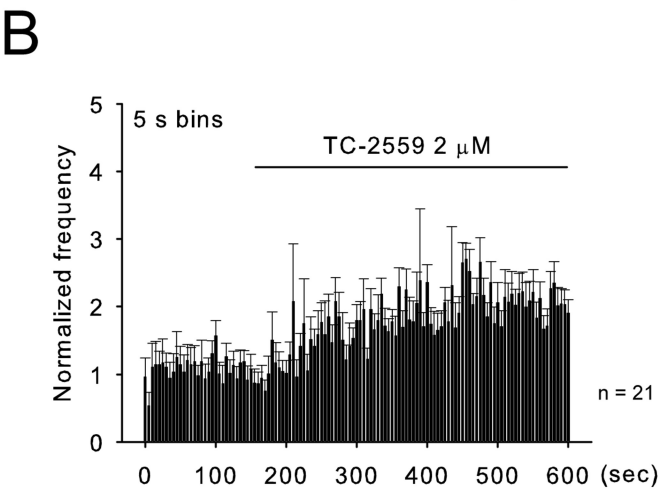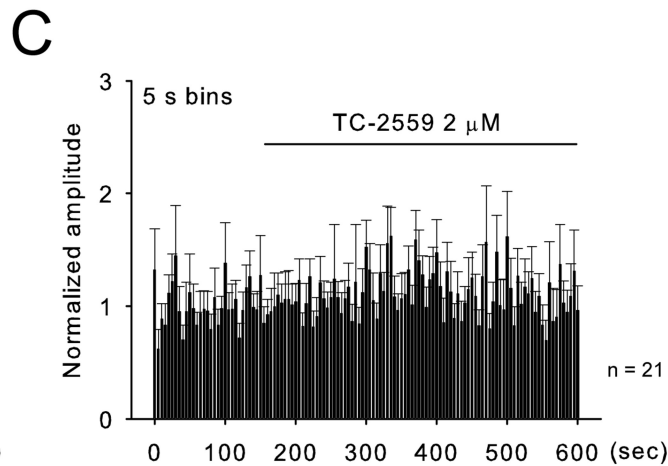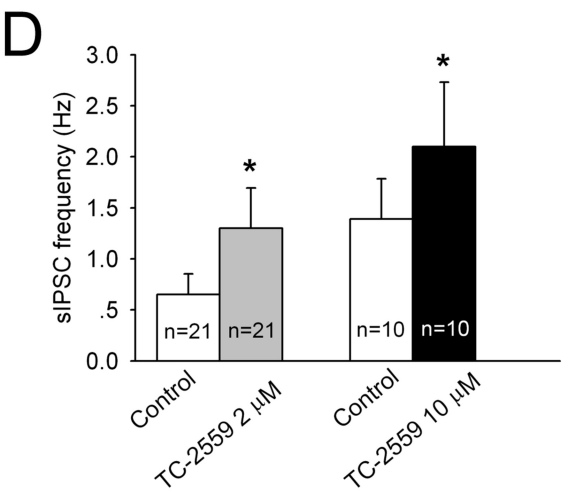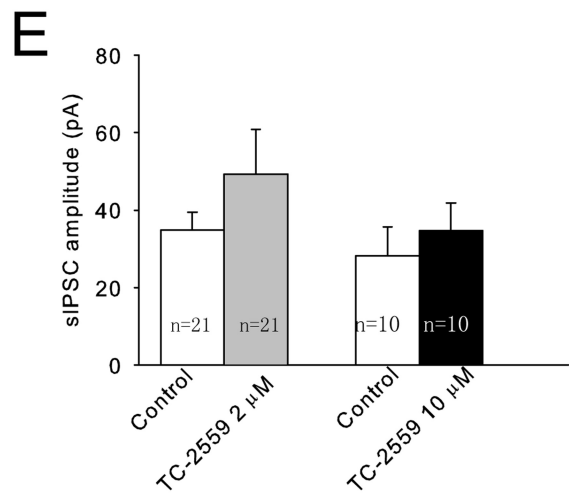

Supplement: MOESM4 [file 9613220]
